# Supplementary material
Source: Springer Nature journal article supplement (https://www.springermedizin.de/resource/supplementary/12885_2014_4803_MOESM1_ESM.pdf/9467336)

**A**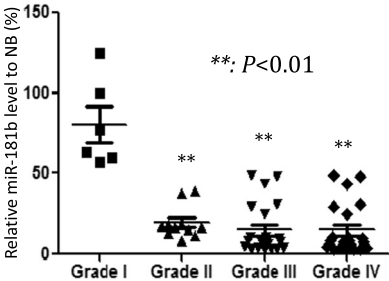**B**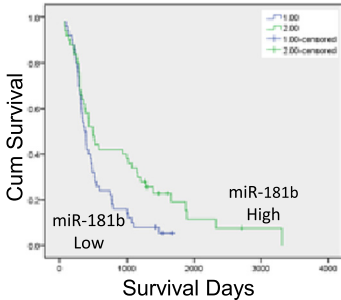

Supplement: MOESM1 [file 9467336]
